# Supplementary material for: Microwave-Assisted Recovery of Spent LiCoO2 Battery from the Corresponding Black Mass
Source: MDPI journal article supplement (doi:10.3390/batteries9110536), 2023-10-28
Supplement: s1 [file s1]

## S1. Supporting Information

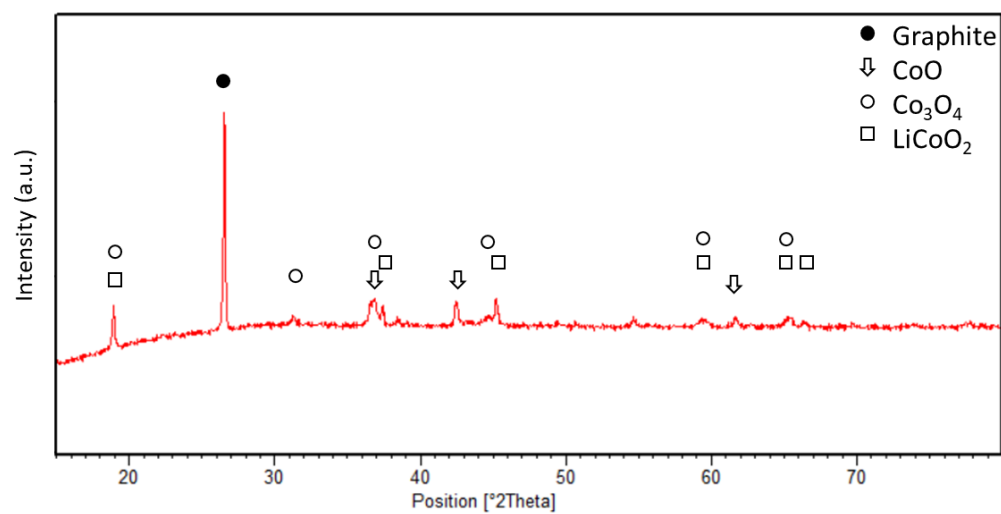

**Figure S 1.** XRD pattern of the as-received LCO after the water leaching.

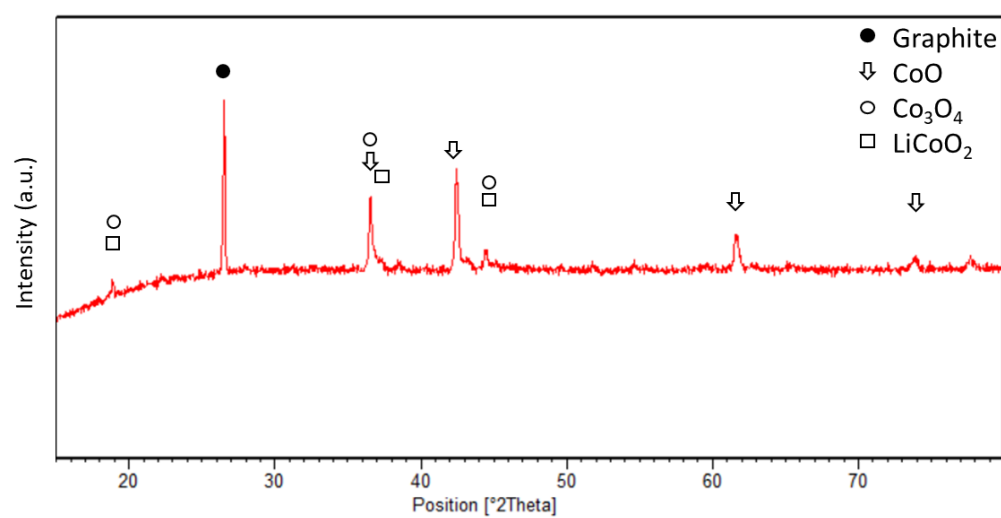

**Figure S 2.** XRD pattern of LCO sample treated at 600 W for 5 min after water leaching.

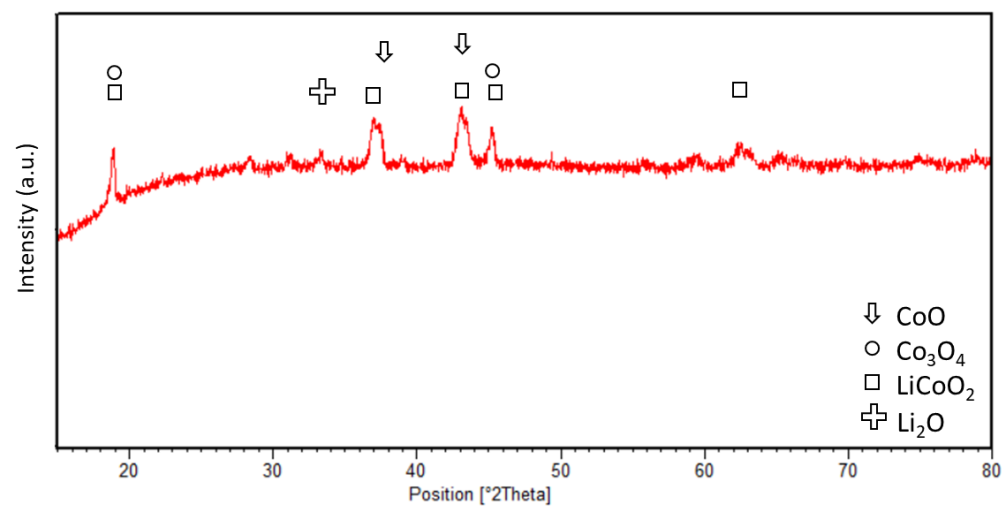

**Figure S 3.** XRD pattern of LCO sample treated at 1000 W for 10 min after water leaching.
